# Supplementary material for: Ceratinadin G, a new psammaplysin derivative possessing a cyano group from a sponge of the genus Pseudoceratina
Source: publisher site journal article supplement (doi:10.3762/bjoc.20.267), 2024-12-09

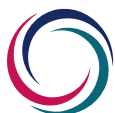

## Supporting Information

for

### **Ceratinadin G, a new psammaplysin derivative possessing a cyano group from a sponge of the genus *Pseudoceratina***

Shin-ichiro Kurimoto, Kouta Inoue, Taito Ohno and Takaaki Kubota

*Beilstein J. Org. Chem.* **2024**, *20*, 3215–3220. [doi:10.3762/bjoc.20.267](https://doi.org/10.3762/bjoc.20.267)

### **$^1\text{H}$ NMR, $^{13}\text{C}$ NMR, $^1\text{H}$ - $^1\text{H}$ COSY, TOCSY, HSQC, HMBC, NOESY, and IR spectra of caratinadin G (1)**

**Table of Contents:**

**Figure S1.**  $^1\text{H}$  NMR spectrum of ceratinadin G (**1**) in  $\text{CD}_3\text{OD}$  (600 MHz).

**Figure S2.**  $^{13}\text{C}$  NMR spectrum of ceratinadin G (**1**) in  $\text{CD}_3\text{OD}$  (150 MHz).

**Figure S3.**  $^1\text{H}$ - $^1\text{H}$  COSY spectrum of ceratinadin G (**1**) in  $\text{CD}_3\text{OD}$  (600 MHz).

**Figure S4.** TOCSY spectrum of ceratinadin G (**1**) in  $\text{CD}_3\text{OD}$  (600 MHz).

**Figure S5.** HSQC spectrum of ceratinadin G (**1**) in  $\text{CD}_3\text{OD}$  (600 MHz).

**Figure S6.** HMBC spectrum of ceratinadin G (**1**) in  $\text{CD}_3\text{OD}$  (600 MHz).

**Figure S7.** NOESY spectrum of ceratinadin G (**1**) in  $\text{CD}_3\text{OD}$  (600 MHz).

**Figure S8.** IR spectrum of ceratinadin G (**1**).

Figure S1:  $^1\text{H}$  NMR spectrum of ceratinadin G (**1**) in  $\text{CD}_3\text{OD}$  (600 MHz).

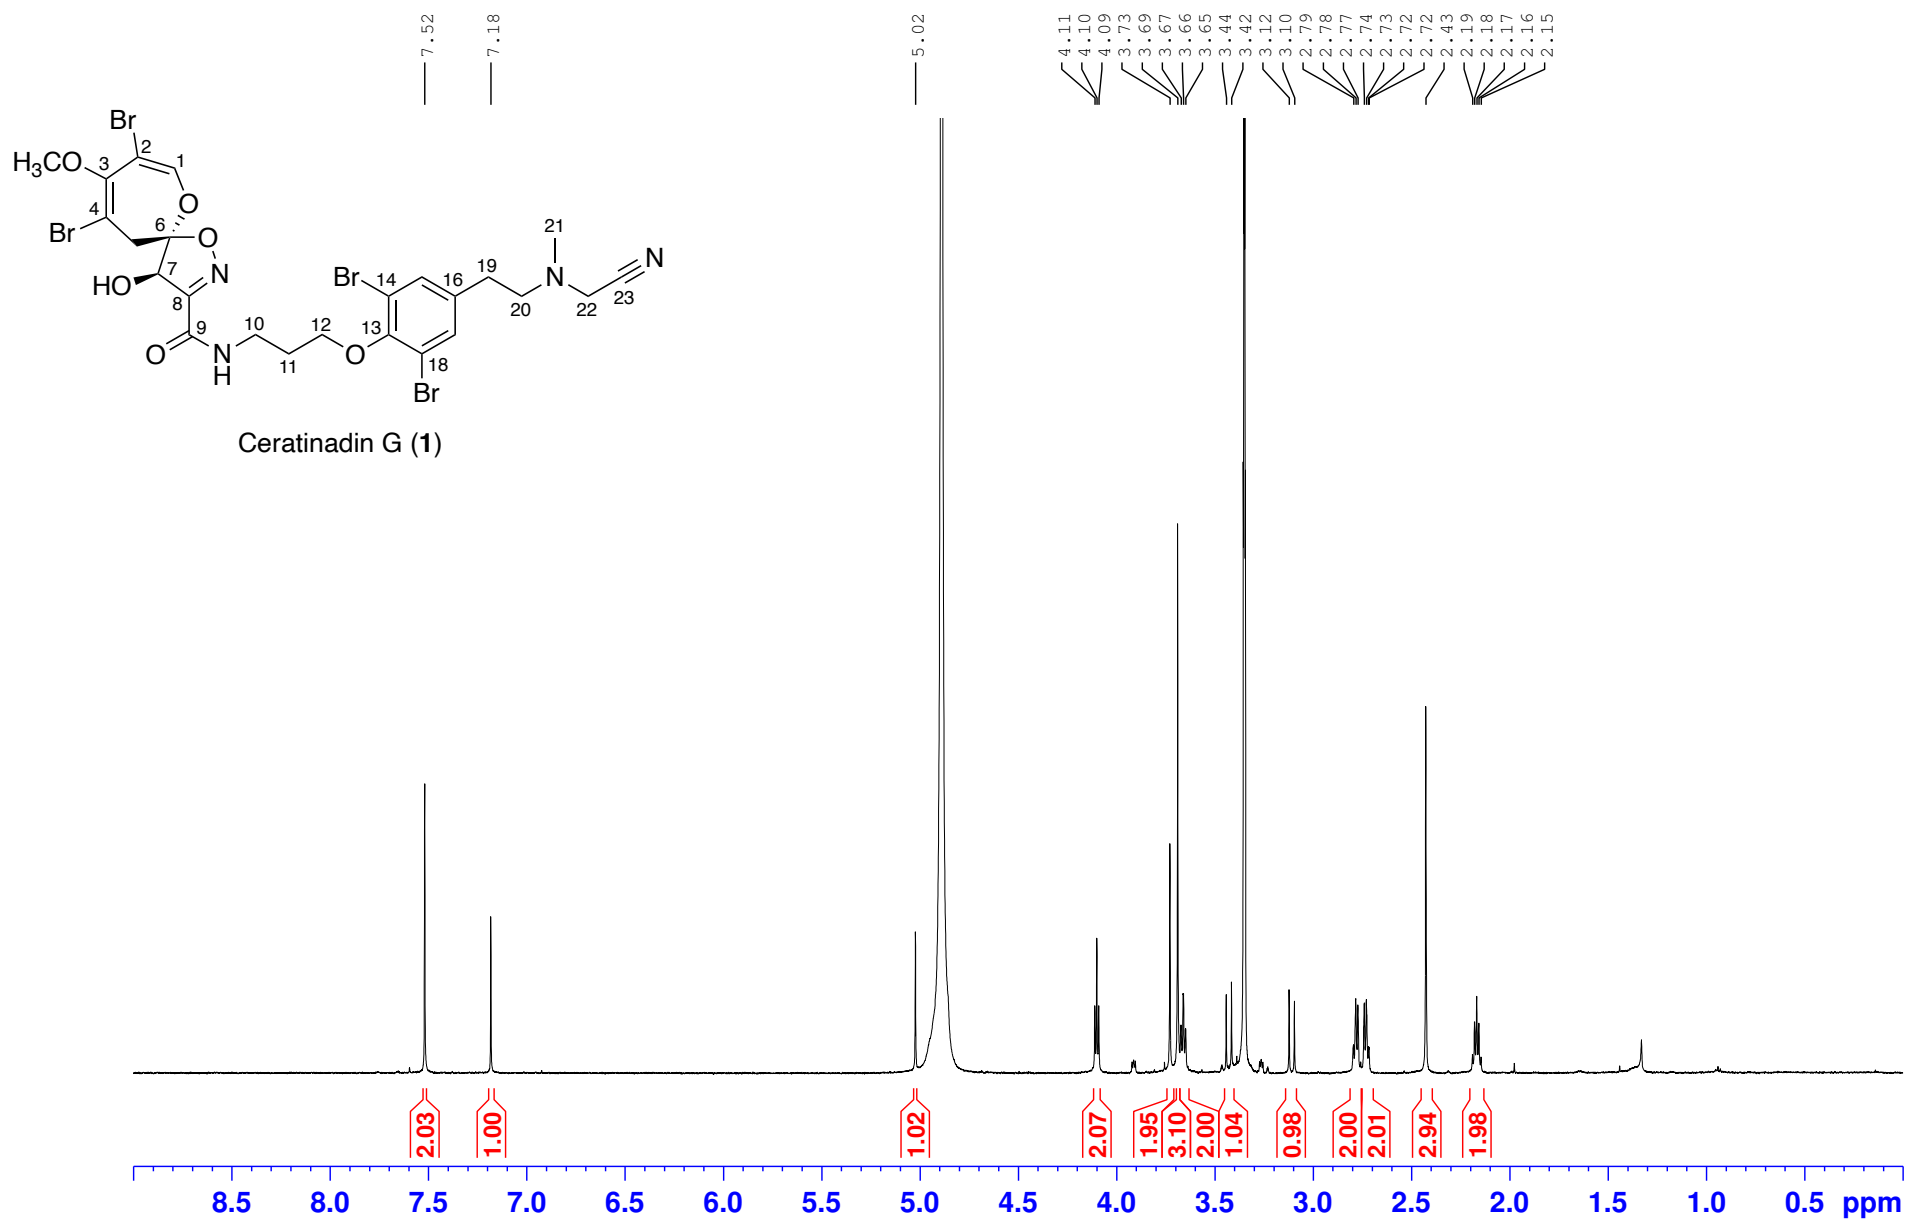

Figure S2:  $^{13}\text{C}$  NMR spectrum of ceratinadin G (1) in  $\text{CD}_3\text{OD}$  (150 MHz).

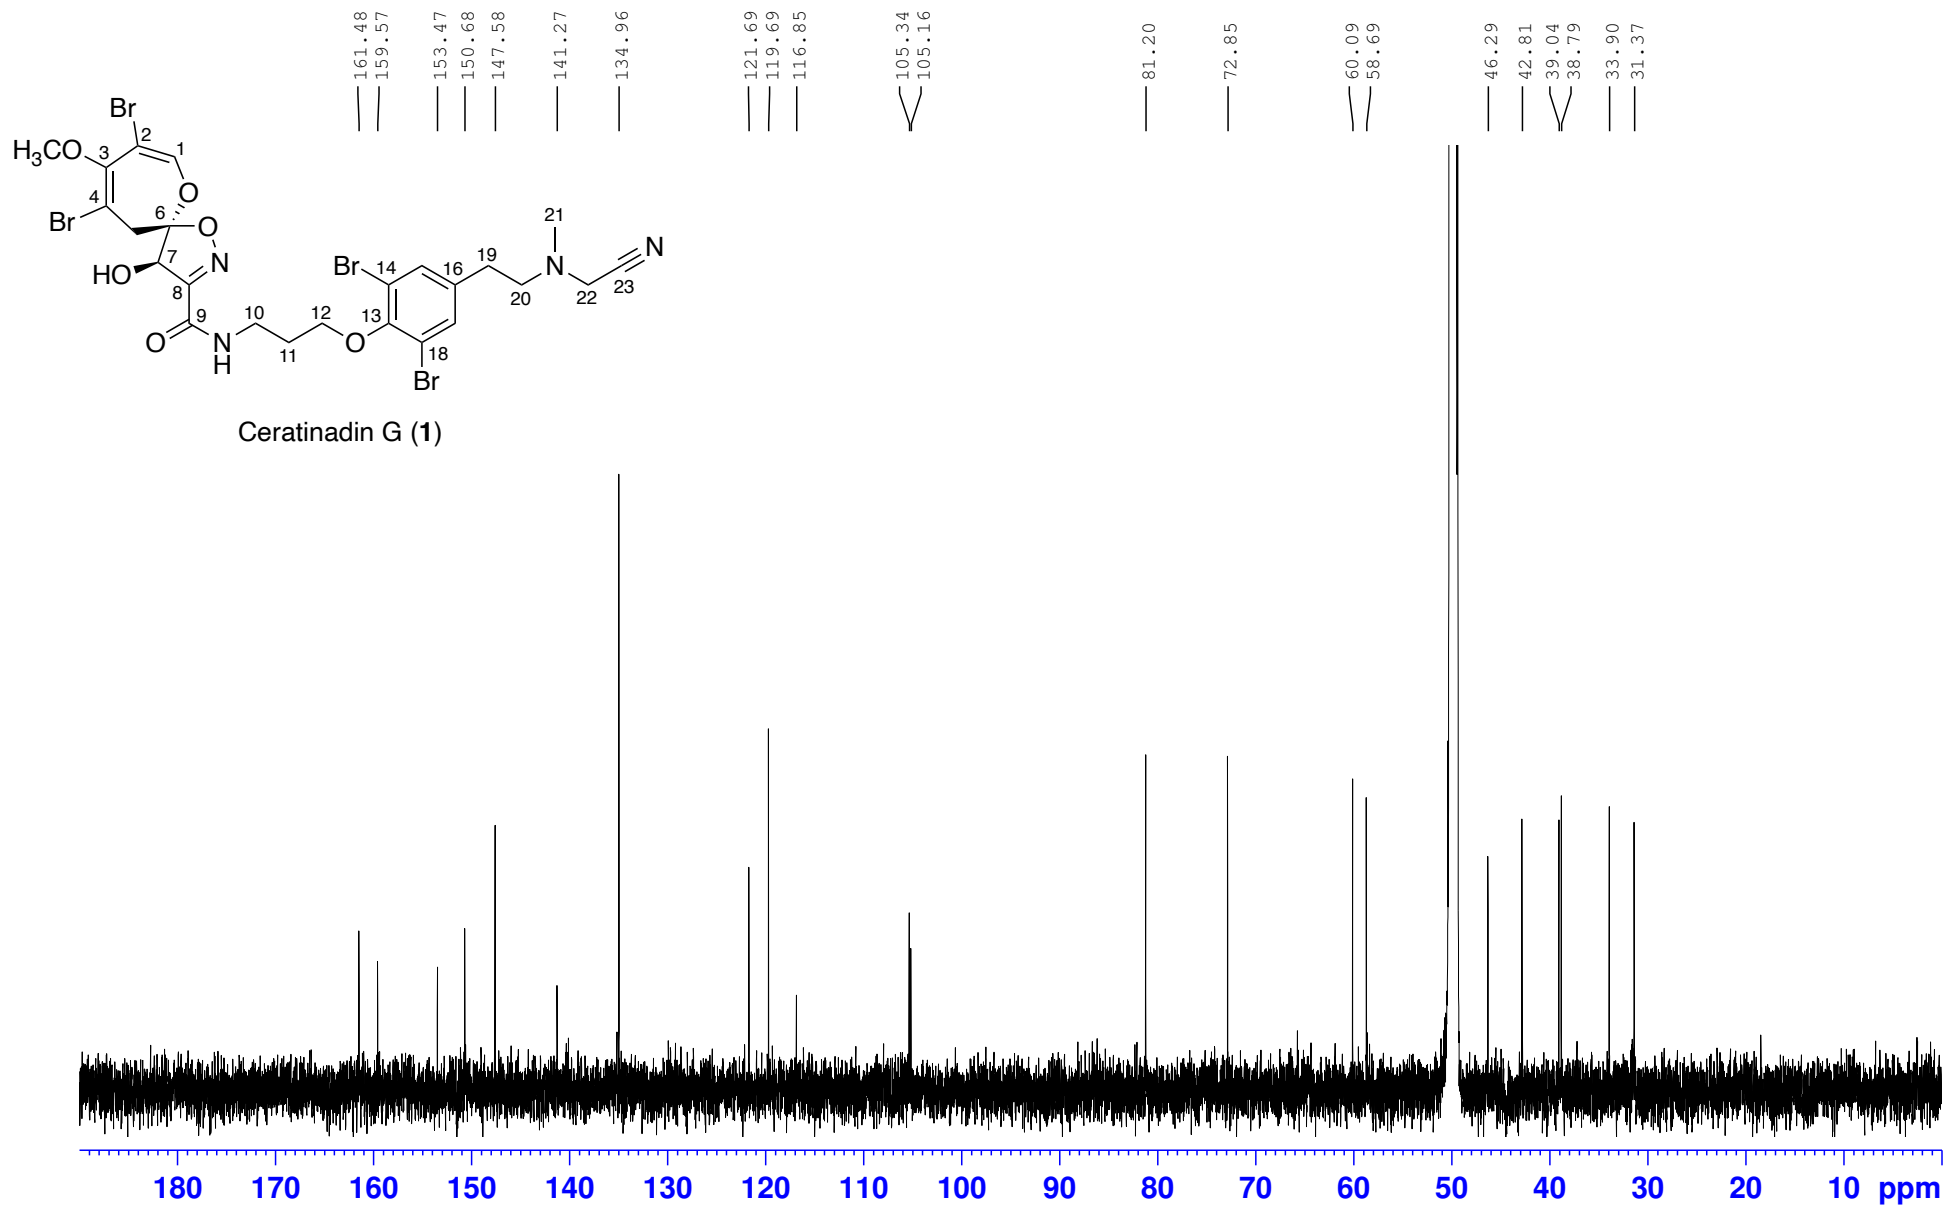

Figure S3:  $^1\text{H}$ - $^1\text{H}$  COSY spectrum of ceratinadin G (1) in  $\text{CD}_3\text{OD}$  (600 MHz).

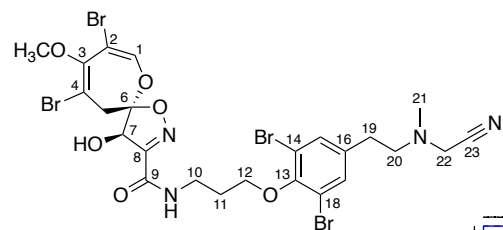

Ceratinadin G (1)

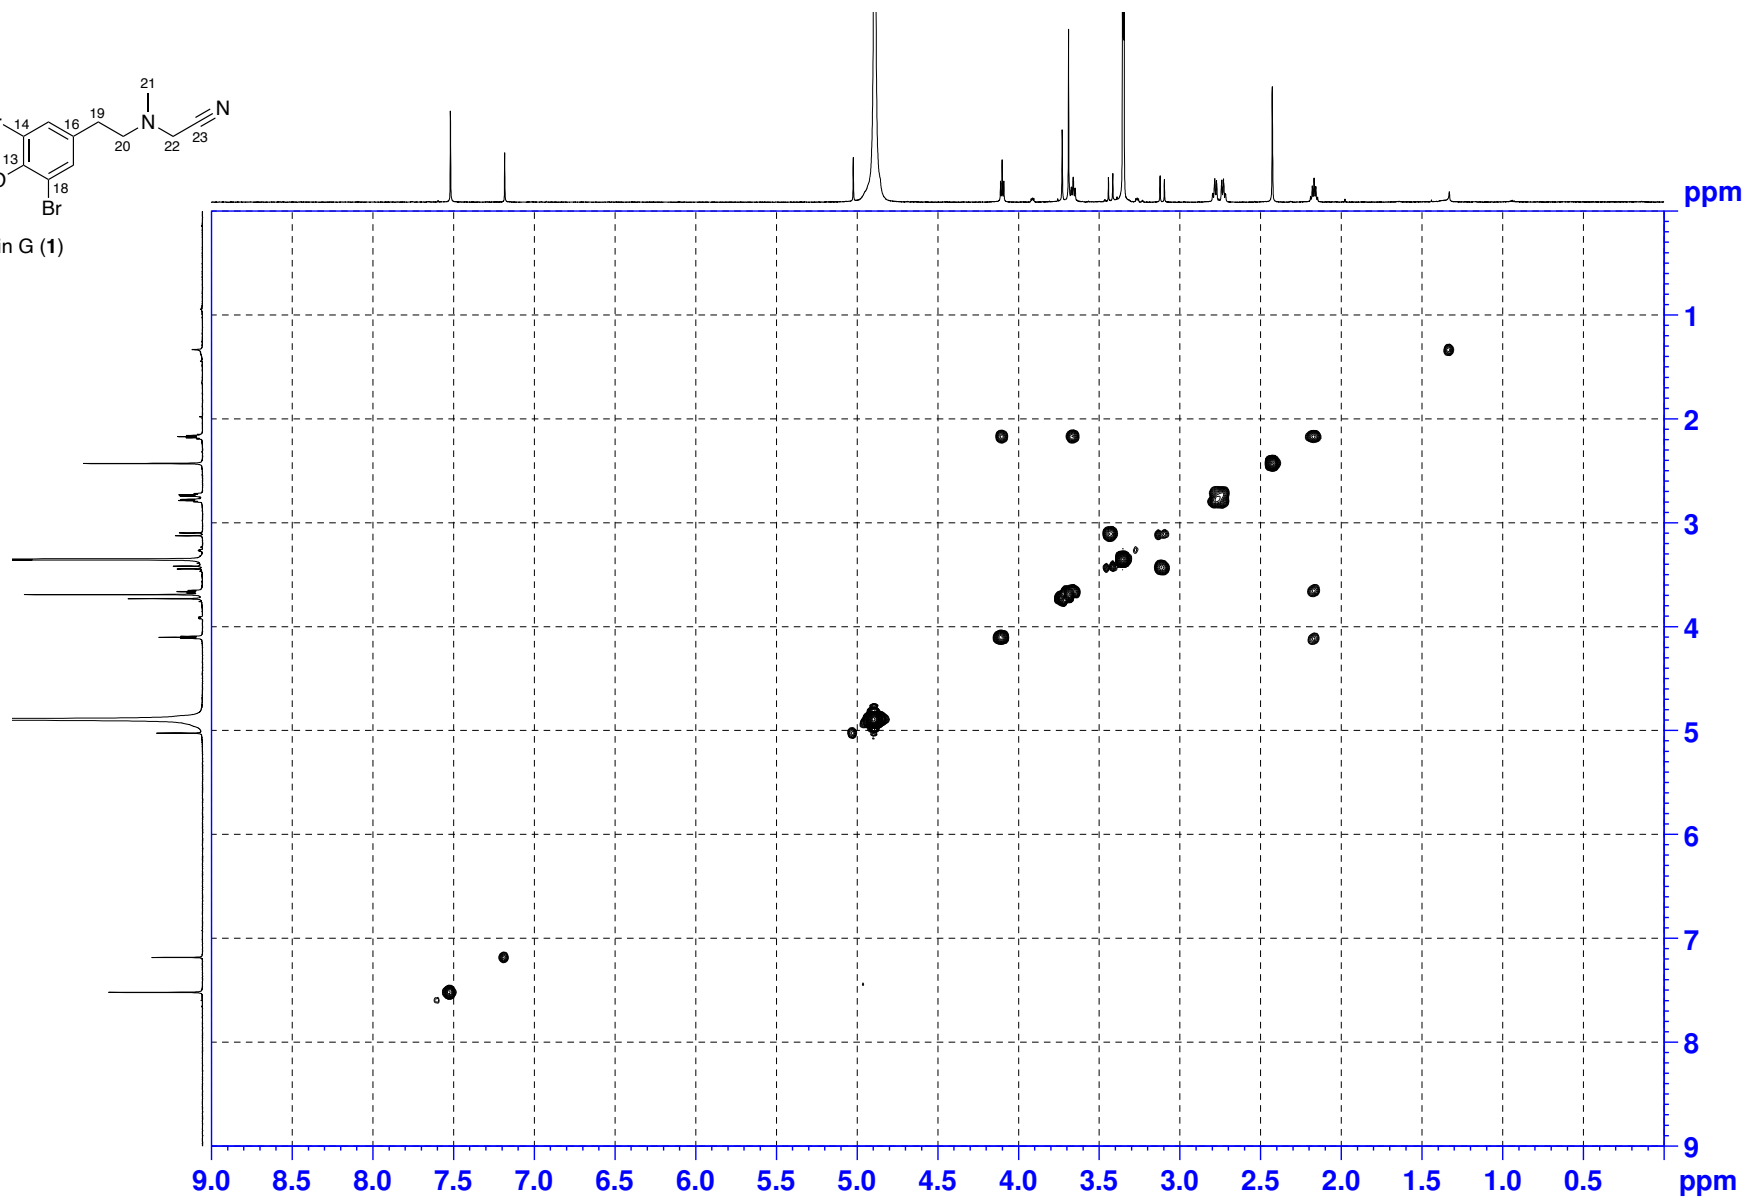

**Figure S4:** TOCSY spectrum of ceratinadin G (**1**) in CD<sub>3</sub>OD (600 MHz).

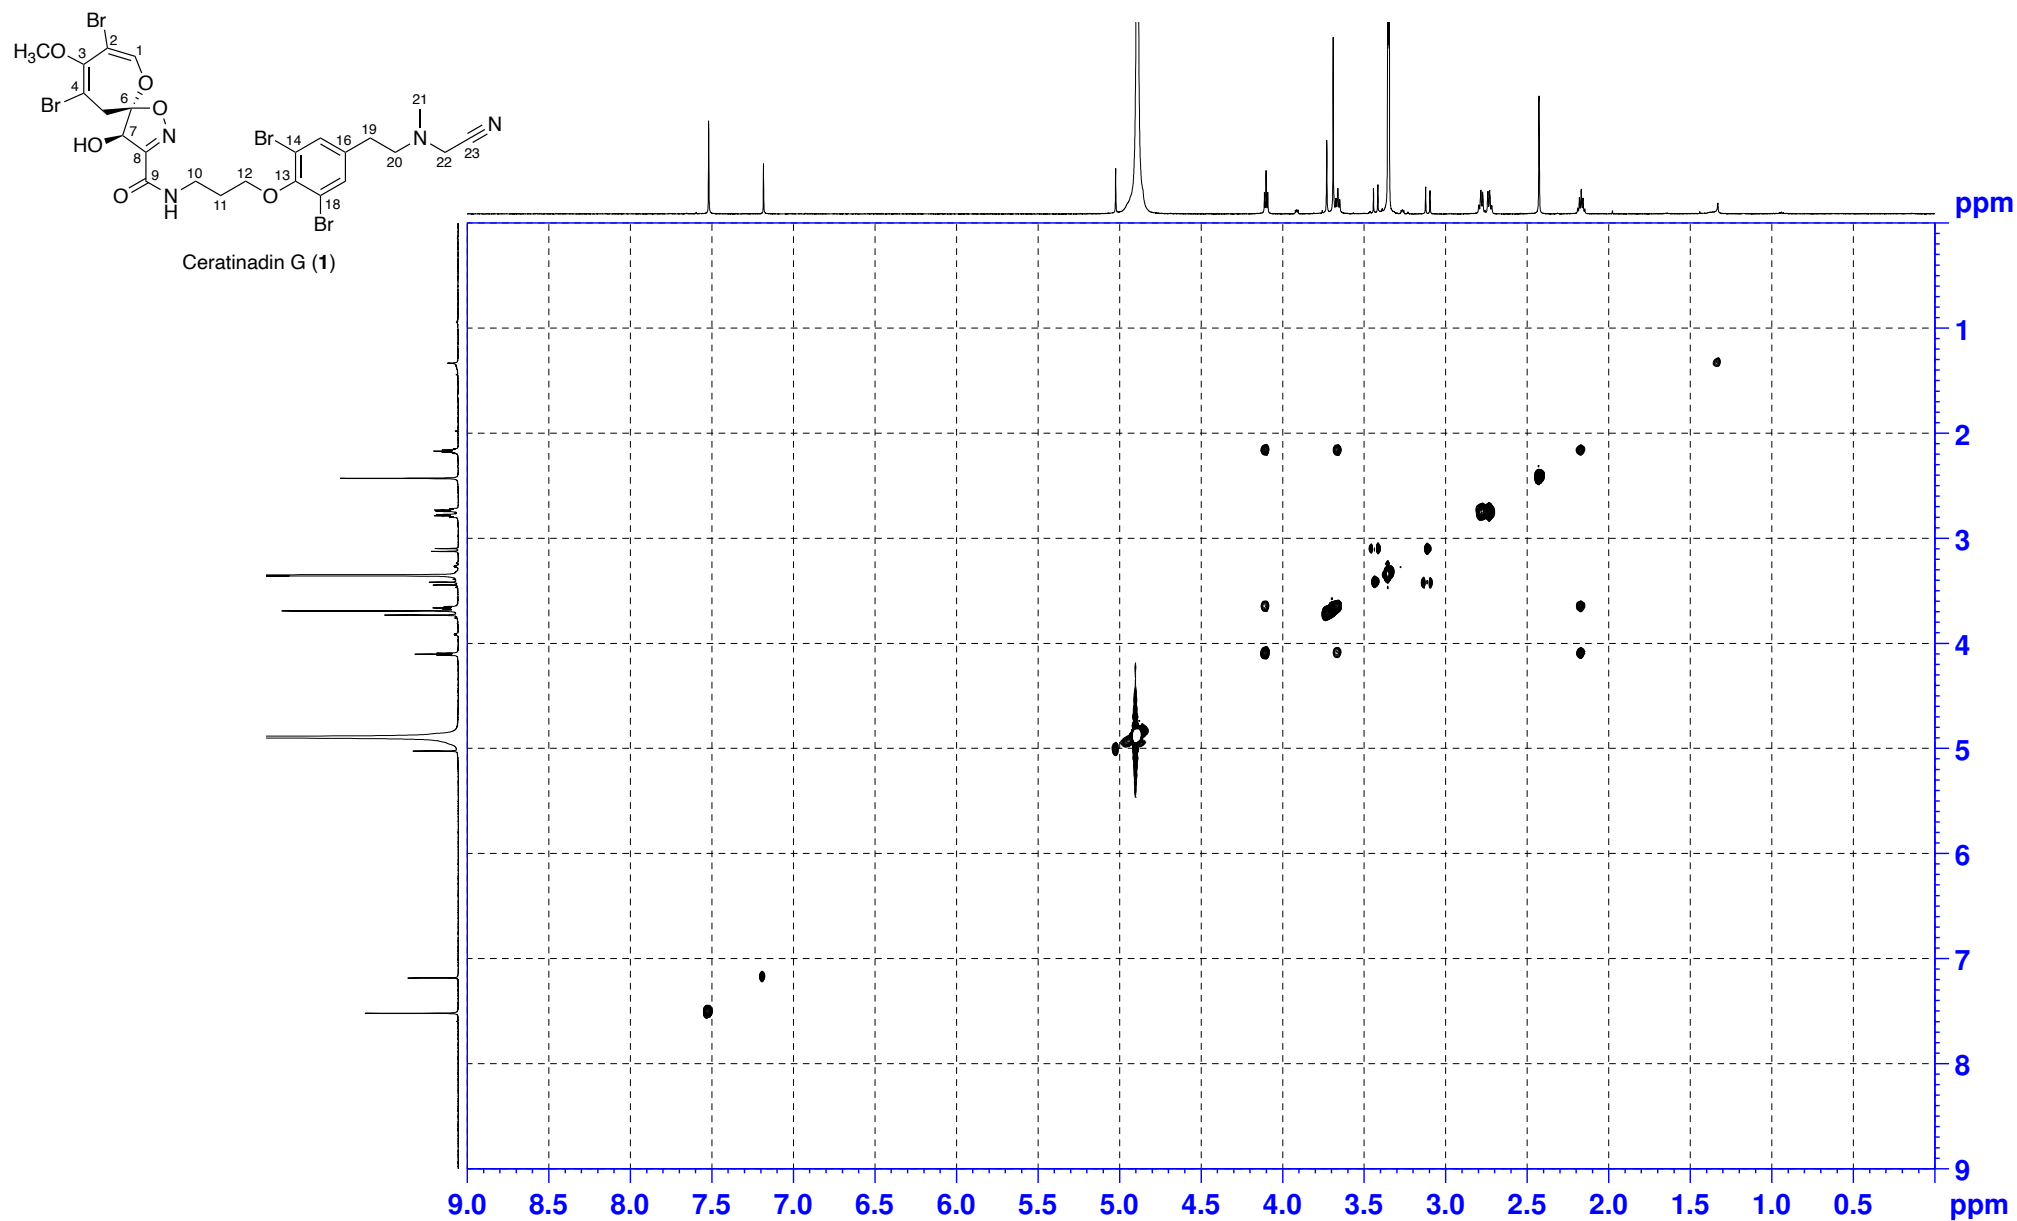

Figure S5: HSQC spectrum of ceratinadin G (1) in CD<sub>3</sub>OD (600 MHz).

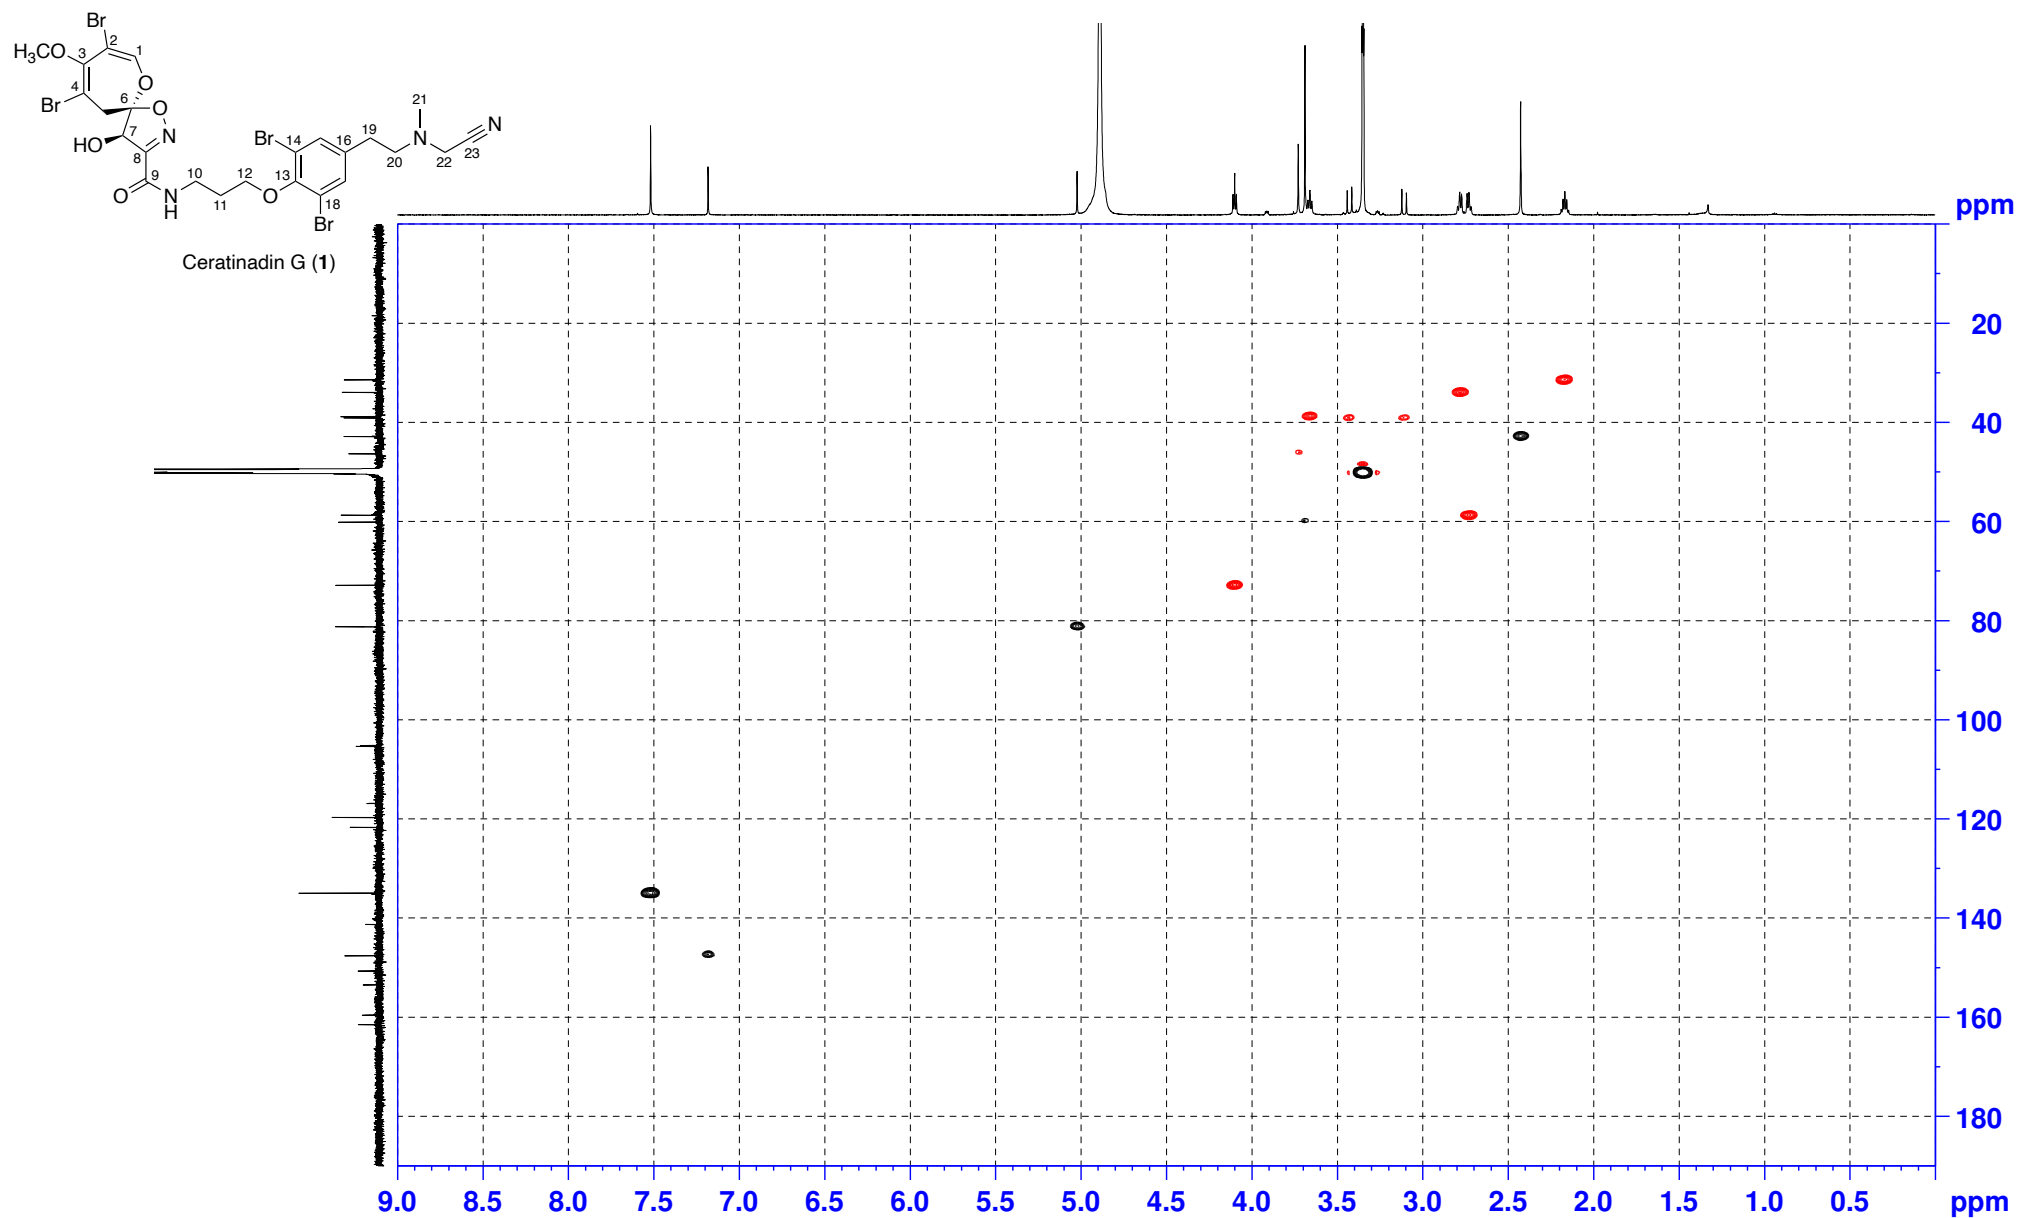

Figure S6: HMBC spectrum of ceratinadin G (1) in CD<sub>3</sub>OD (600 MHz).

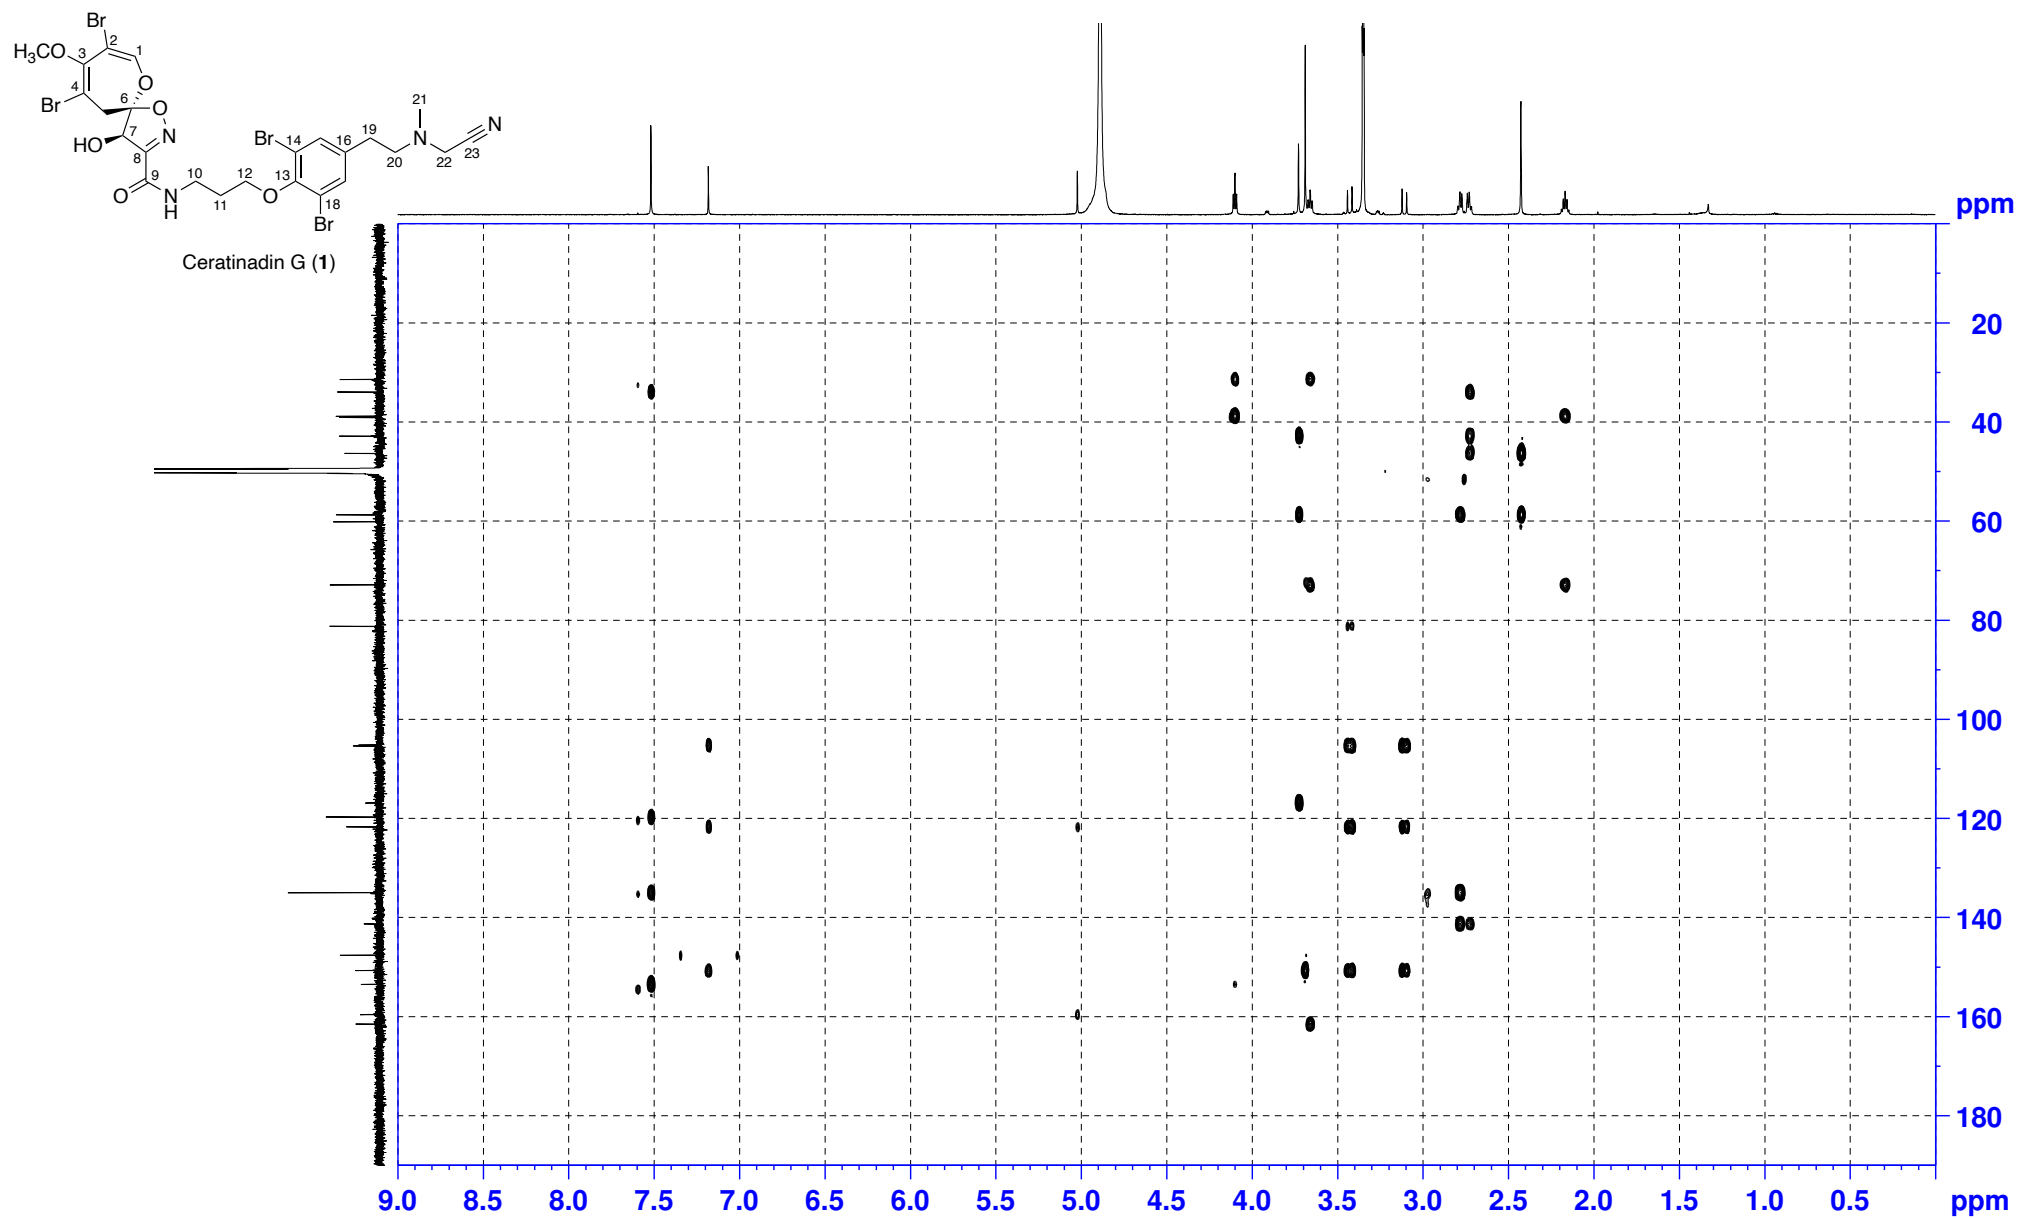



Figure S7: NOESY spectrum of ceratinadin G (1) in CD<sub>3</sub>OD (600 MHz).

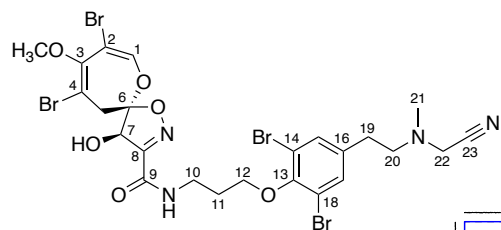

Ceratinadin G (1)

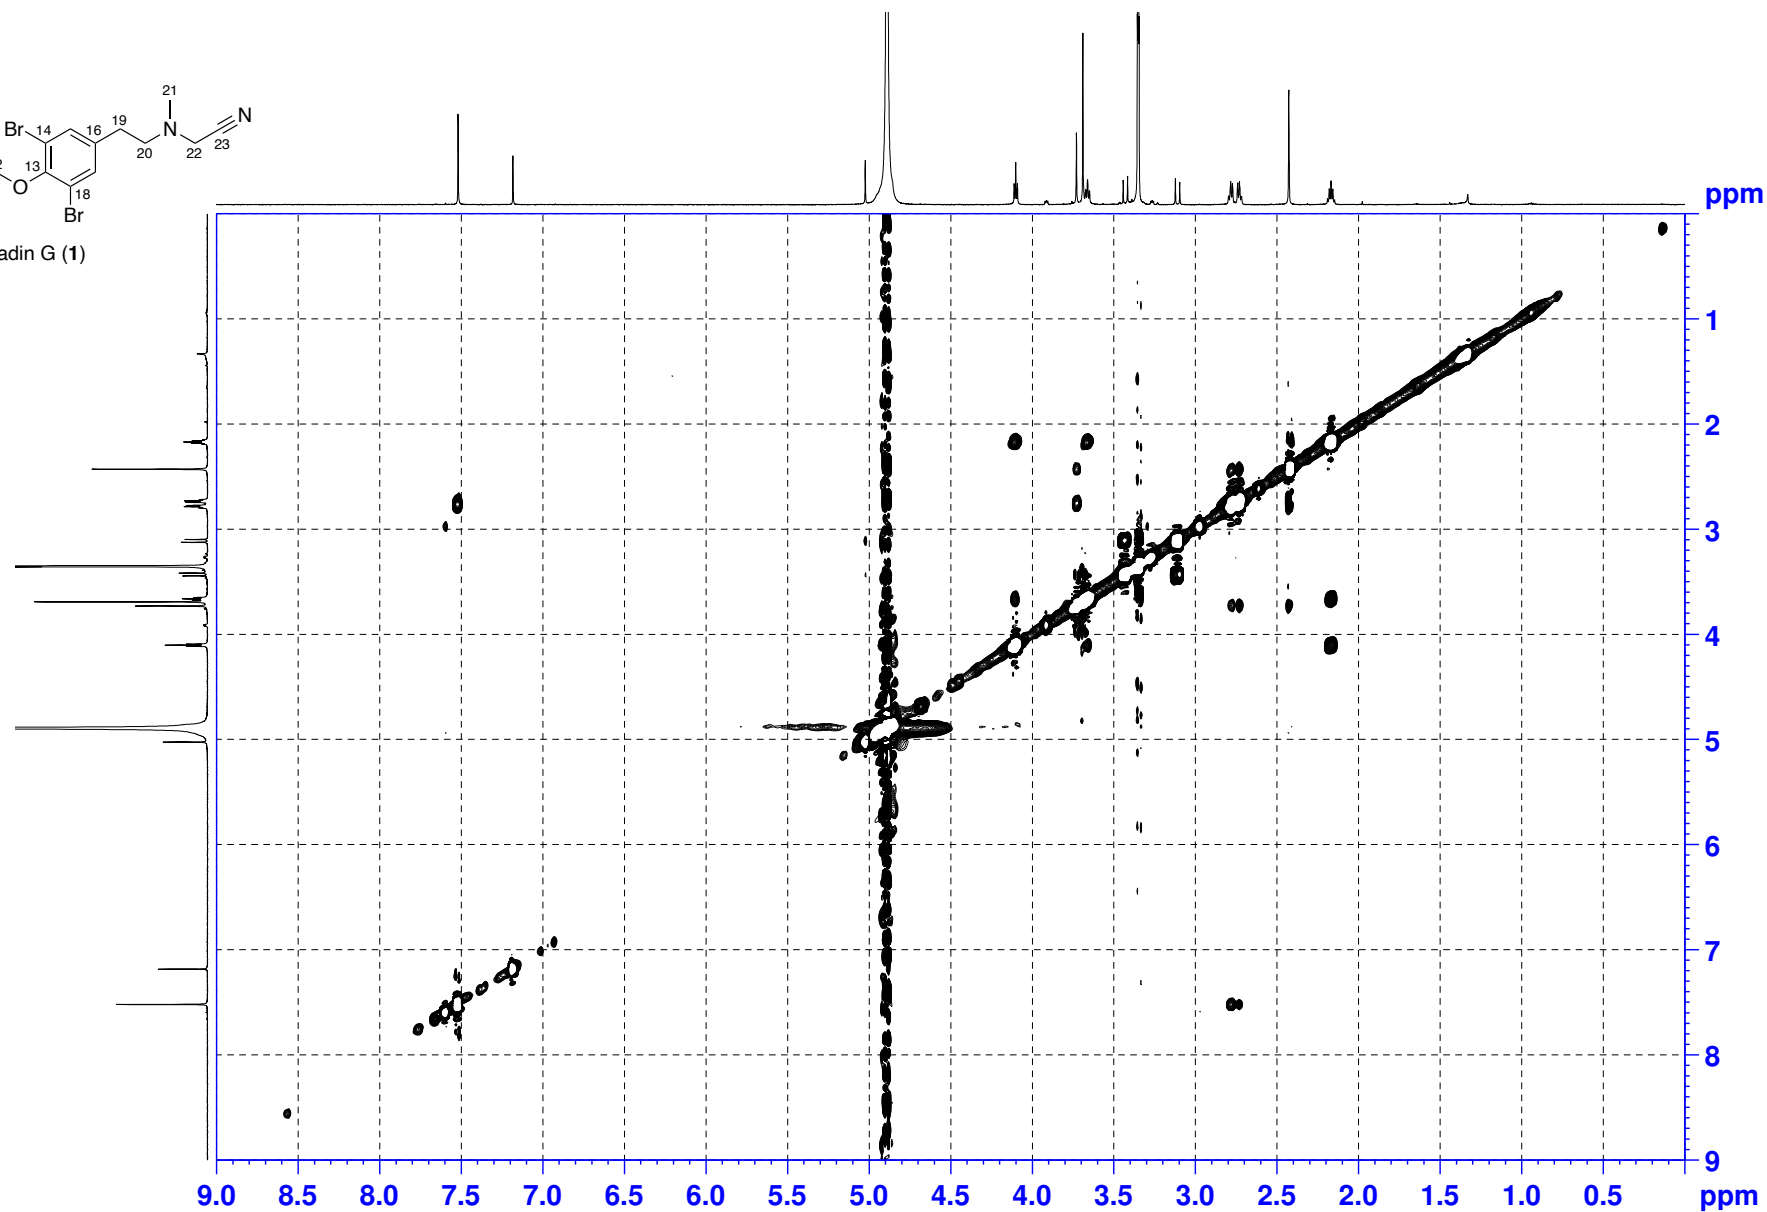

Figure S8: IR spectrum of ceratinadin G (1).

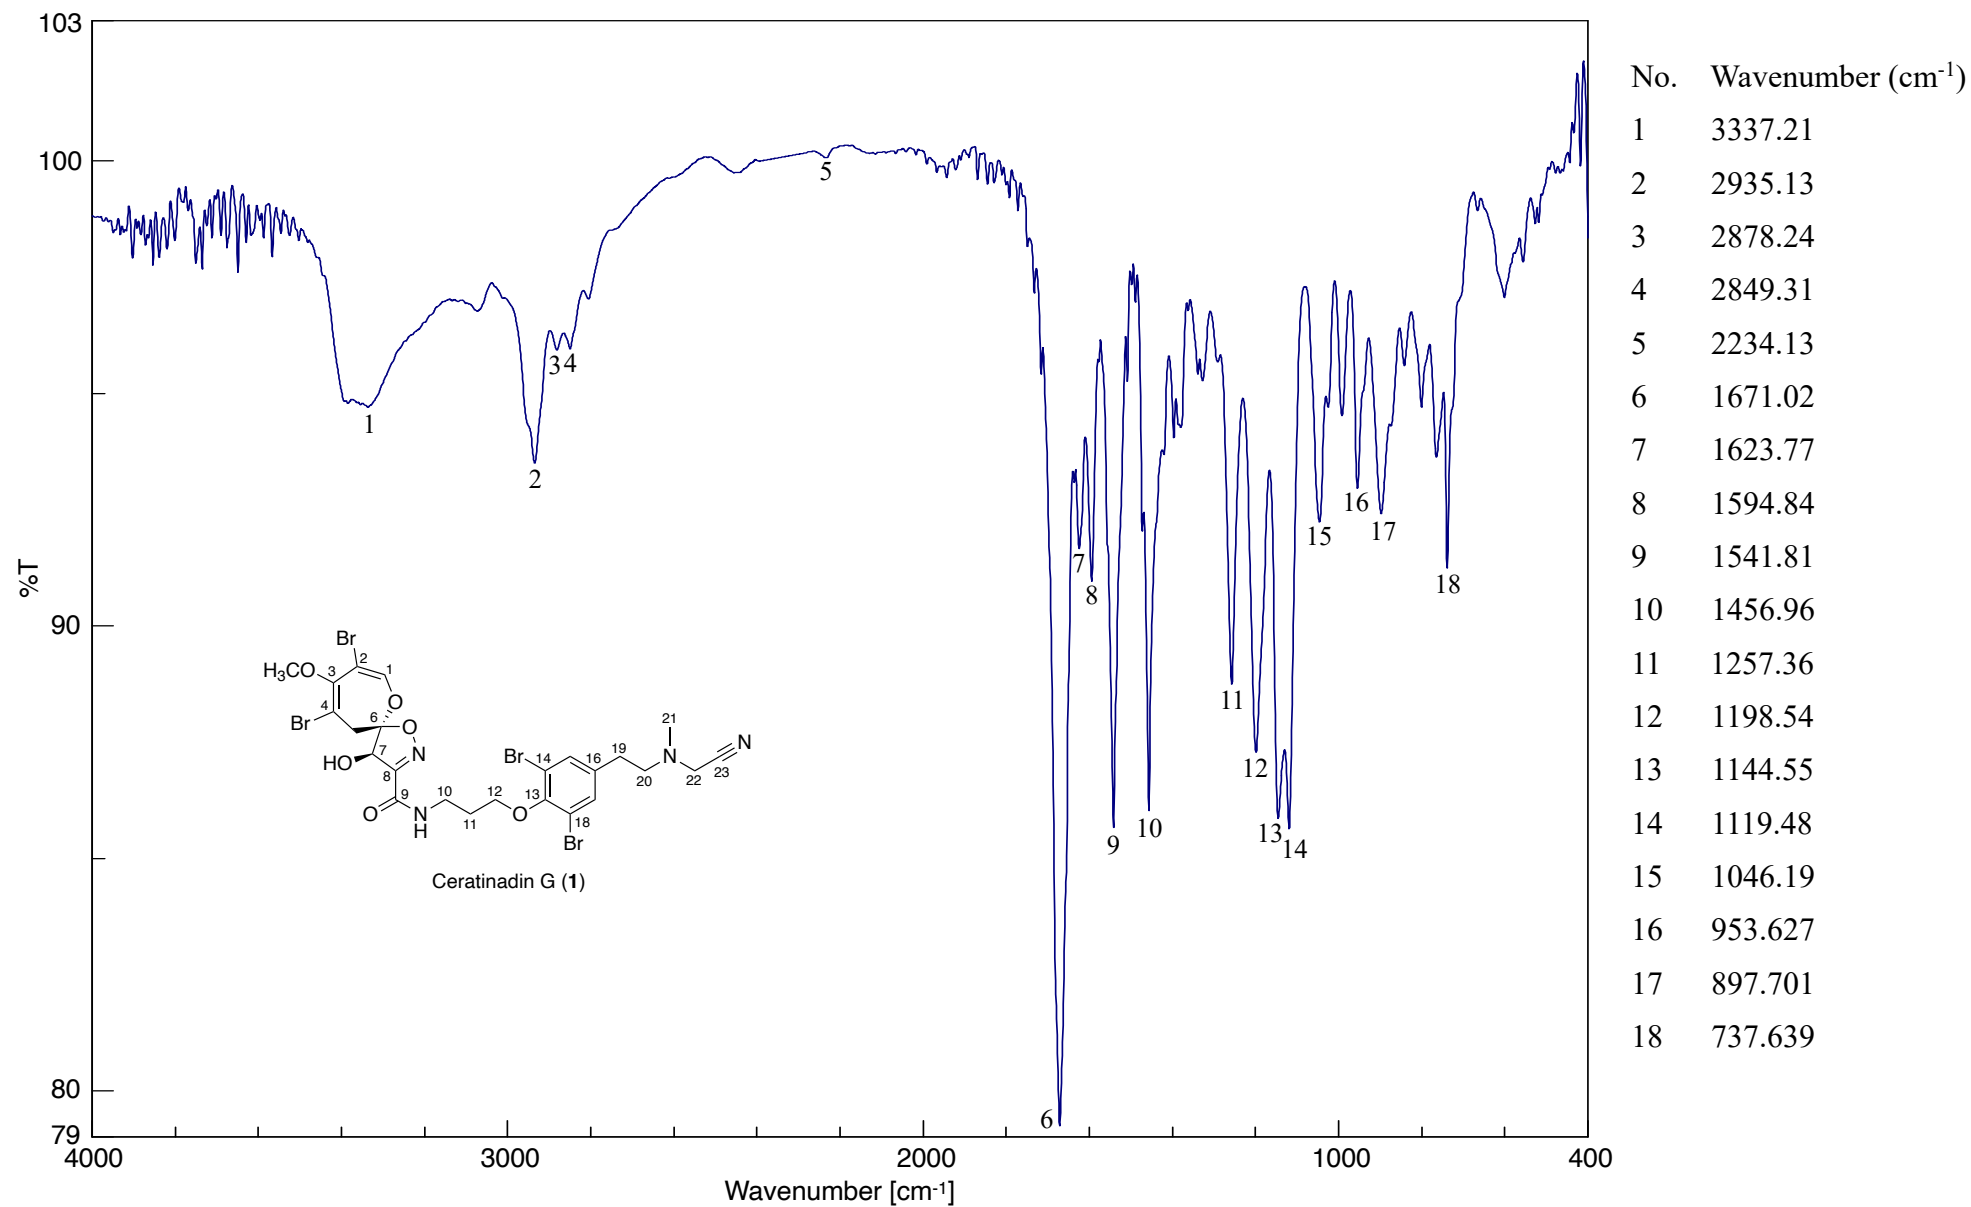

Supplement: Additional file 1 [file 1860-5397-20-267-S1.pdf]
